# Supplementary material
Source: PubMed Central journal article supplement (PMC3601495)
Supplement: NIHMS445435-supplement-Supp_Material.pdf [file NIHMS445435-supplement-Supp_Material.pdf]

Web-based supplementary materials for “Estimation of stratified mark-specific proportional hazards models with missing marks” by Yanqing Sun and Peter Gilbert.

## Web Appendix A

In this and the rest of Appendices, the references and equation numbers not defined in the Appendices refer to the expressions in the main paper.

The following Lemma 1 and Lemma 2 are extensions of Theorem 5.7 and Theorem 5.9 of van der Vaart (1998), respectively, and will be used to prove the uniform consistency of  $\hat{\beta}(v)$ .

**Lemma 1.** *Let  $Q_n(v, \theta)$  be random functions and let  $Q(v, \theta)$  be a fixed function of  $(v, \theta) \in [a, b] \times \Theta$ ,  $\Theta \subset R^p$ . Let  $\beta(v)$  be a fixed function of  $v \in [a, b]$  taking values in  $\Theta$ . Assume that  $\sup_{v, \theta} |Q_n(v, \theta) - Q(v, \theta)| \xrightarrow{P} 0$  and that for every  $\epsilon > 0$  there exists a  $\eta > 0$  such that  $\sup_{\|\theta - \beta(v)\| > \epsilon} Q(v, \theta) < Q(v, \beta(v)) - \eta$  for  $v \in [a, b]$ . Then for any sequence of estimators  $\hat{\beta}(v)$ , with  $Q_n(v, \hat{\beta}(v)) > Q_n(v, \beta(v)) - o_p(1)$  uniformly in  $v \in [a, b]$ , we have  $\hat{\beta}(v) \xrightarrow{P} \beta(v)$  uniformly in  $v \in [a, b]$ .*

**PROOF.** For every  $\epsilon > 0$ , there exists a  $\eta > 0$  such that

$$\{\sup_v \|\hat{\beta}(v) - \beta(v)\| > \epsilon\} \subset \cup_v \{\|\hat{\beta}(v) - \beta(v)\| > \epsilon\} \subset \cup_v \{Q(v, \hat{\beta}(v)) < Q(v, \beta(v)) - \eta\}.$$

Since  $Q_n(v, \hat{\beta}(v)) > Q_n(v, \beta(v)) - o_p(1) \xrightarrow{P} Q(v, \beta(v))$ , uniformly in  $v \in [a, b]$ , we have  $Q_n(v, \hat{\beta}(v)) > Q(v, \beta(v)) - o_p(1)$ , uniformly in  $v \in [a, b]$ . It follows that

$$\begin{aligned} & \cup_v \{Q(v, \hat{\beta}(v)) < Q(v, \beta(v)) - \eta\} \subset \cup_v \{Q(v, \hat{\beta}(v)) < Q_n(v, \hat{\beta}(v)) - \eta + o_p(1)\} \\ & = \{\inf_v (Q(v, \hat{\beta}(v)) - Q_n(v, \hat{\beta}(v))) < -\eta + o_p(1)\} \\ & = \{\sup_v (Q_n(v, \hat{\beta}(v)) - Q(v, \hat{\beta}(v))) > \eta - o_p(1)\} \\ & \subset \{\sup_v |Q_n(v, \hat{\beta}(v)) - Q(v, \hat{\beta}(v))| > \eta - o_p(1)\}, \end{aligned}$$

whose probability goes to 0 by the uniform convergence of  $Q_n(v, \theta)$  to  $Q(v, \theta)$ . Hence  $P\{\sup_v \|\hat{\beta}(v) - \beta(v)\| > \epsilon\} \rightarrow 0$ .  $\square$

**Lemma 2.** *Let  $\Psi_n(v, \theta)$  be random vector-valued functions and let  $\Psi(v, \theta)$  be a fixed vector-valued function of  $(v, \theta) \in [a, b] \times \Theta$ ,  $\Theta \subset R^p$ . Let  $\beta(v)$  be a fixed function of  $v \in [a, b]$  taking*

values in  $\Theta$ . Assume that  $\sup_{v,\theta} \|\Psi_n(v, \theta) - \Psi(v, \theta)\| \xrightarrow{P} 0$  and that for every  $\epsilon > 0$  there exists a  $\eta > 0$  such that  $\inf_{\|\theta - \beta(v)\| > \epsilon} \|\Psi(v, \theta)\| > \|\Psi(v, \beta(v))\| + \eta = \eta$  for  $v \in [a, b]$ . Then for any sequence of estimators  $\hat{\beta}(v)$ , with  $\|\Psi_n(v, \hat{\beta}(v))\| = o_p(1)$  uniformly in  $v \in [a, b]$ , we have  $\hat{\beta}(v) \xrightarrow{P} \beta(v)$  uniformly in  $v \in [a, b]$ .

PROOF. Lemma 2 follows from applying Lemma 1 to the function  $Q_n(v, \theta) = -\|\Psi_n(v, \theta)\|$  and  $Q(v, \theta) = -\|\Psi(v, \theta)\|$ .  $\square$

**Lemma 3.** Suppose that  $(W_i, X_i), i = 1, \dots, n$ , are independent random variables satisfying  $\sup_{1 \leq i \leq n} E(X_i^4) \leq M < \infty$ ,  $\sup_{1 \leq i \leq n} E(g_n^4(W_i)) \rightarrow 0$ , and  $\sup_{i \neq j} E\{g_n(W_i)X_i g_n(W_j)X_j\} = o(n^{-1})$ , where  $g_n(\cdot)$  is a random function. Then

$$E \left\{ \left( n^{-1/2} \sum_{i=1}^n g_n(W_i)X_i \right)^2 \right\} \rightarrow 0.$$

PROOF OF LEMMA 3.

$$\begin{aligned} & E \left\{ \left( n^{-1/2} \sum_{i=1}^n g_n(W_i)X_i \right)^2 \right\} \\ &= n^{-1} \sum_{i=1}^n \sum_{j=1}^n E \{ g_n(W_i)X_i g_n(W_j)X_j \} \\ &= n^{-1} \sum_{i=1}^n E \{ (g_n(W_i)X_i)^2 \} + o(1) \\ &= n^{-1} \sum_{i=1}^n E \{ E[(g_n(W_i))^2 | W_i] E[(X_i)^2 | W_i] \} + o(1) \\ &\leq n^{-1} \sum_{i=1}^n \{ E[(g_n(W_i))^4] \}^{1/2} \{ E[(X_i)^4] \}^{1/2} + o(1) \\ &= o(1). \quad \square \end{aligned}$$

PROOF OF THEOREM 1. Let  $\psi_{k0}$  be the true value of  $\psi_k$  such that  $r_k(W_{ki}) = r_k(W_{ki}, \psi_{k0})$  under the correctly specified model for  $r(W_{ki})$ . Then  $\hat{\psi}_k \xrightarrow{P} \psi_{k0}$ . Let  $\psi_0 = (\psi_{10}, \dots, \psi_{K0})$ ,

$$\eta_n(u, \theta, \hat{\psi}) = n^{-1} \sum_{k=1}^K \sum_{i=1}^{n_k} \int_0^u \int_0^\tau (Z_{ki}(t) - \tilde{Z}_k(t, \theta, \hat{\psi}_k)) \frac{R_{ki}}{\pi_k(Q_{ki}, \hat{\psi}_k)} N_{ki}(dt, du),$$

$$\xi_n(u, \theta, \psi_0) = n^{-1} \sum_{k=1}^K \sum_{i=1}^{n_k} \int_0^u \int_0^\tau (Z_{ki}(t) - \bar{z}_k(t, \theta)) \frac{R_{ki}}{\pi_k(Q_{ki}, \psi_{k0})} N_{ki}(dt, du).$$

Under the conditions of Theorem 1,  $\eta_n(v, \theta, \hat{\psi}) = \xi_n(v, \theta, \psi_0) + O_p(n^{-1/2})$ , uniformly in  $v \in [0, 1]$  and

$$\begin{aligned} n^{-1} U_{ipw}(v, \theta, \hat{\psi}) &= \int_0^1 K_h(u - v) \eta_n(du, \theta, \hat{\psi}) \\ &= \int_0^1 K_h(u - v) \xi_n(du, \theta, \psi_0) + O_p(n^{-1/2} h^{-1}), \end{aligned} \quad (\text{W.1})$$

uniformly in  $(v, \theta) \in [0, 1] \times [-M, M]$ , for  $M > 0$ .

By application of the Glivenko–Cantelli and Donsker theorems, similar to the proofs of Lemma 2 and Theorem 1 of Sun *et al.* (2009),  $\xi_n(v, \theta, \psi_0) = \xi(v, \theta, \psi_0) + O_p(n^{-1/2})$ , uniformly in  $(v, \theta) \in [0, 1] \times [-M, M]$ , where

$$\begin{aligned} \xi(v, \theta, \psi_0) &= \sum_{k=1}^K p_k E \left[ \int_0^v \int_0^\tau (Z_{ki}(t) - \bar{z}_k(t, \theta)) \frac{R_{ki}}{\pi_k(Q_{ki}, \psi_{k0})} N_{ki}(dt, du) \right] \\ &= \sum_{k=1}^K p_k \left\{ E \left[ \int_0^v \int_0^\tau (Z_{ki}(t) - \bar{z}_k(t, \theta)) N_{ki}(dt, du) \right] \right. \\ &\quad \left. - E \left[ \int_0^v \int_0^\tau (Z_{ki}(t) - \bar{z}_k(t, \theta)) \left( 1 - \frac{R_{ki}}{\pi_k(Q_{ki}, \psi_{k0})} \right) N_{ki}(dt, du) \right] \right\}. \end{aligned} \quad (\text{W.2})$$

The first expectation is zero under model (2) by Sun *et al.* (2009). Using the double expectation formula  $E[\cdot] = E\{E[\cdot | V_{ki}, W_{ki}, \delta_{ki}]\}$  and the missing at random assumption (3), the second expectation is zero. Hence

$$n^{-1} U_{ipw}(v, \theta, \hat{\psi}) = \int_0^1 K_h(u - v) \xi(du, \theta, \psi_0) + O_p(n^{-1/2} h^{-1}) = o_p(1),$$

uniformly in  $(v, \theta) \in [a, b] \times [-M, M]$  for  $M > 0$ . By Lemma 2,  $\hat{\beta}_{ipw}(v) \xrightarrow{P} \beta(v)$  uniformly in  $v \in [a, b]$  as  $nh^2 \rightarrow \infty$ .  $\square$

#### PROOF OF THEOREM 2.

By a Taylor expansion,  $U_{ipw}(v, \hat{\beta}(v), \hat{\psi}) - U_{ipw}(v, \beta(v), \hat{\psi}) = U'_{ipw}(v, \beta^*(v), \hat{\psi}) (\hat{\beta}(v) - \beta(v))$ , where  $\beta^*(v)$  is on the line segment between  $\hat{\beta}(v)$  and  $\beta(v)$ . Hence,

$$\begin{aligned} n^{1/2} h^{1/2} (\hat{\beta}^{ipw}(v) - \beta(v)) &= -(U'_{ipw}(v, \beta^*(v), \hat{\psi})/n)^{-1} n^{-1/2} h^{1/2} U_{ipw}(v, \beta(v), \hat{\psi}) \\ &= (\Sigma(v))^{-1} n^{-1/2} h^{1/2} U_{ipw}(v, \beta(v), \hat{\psi}) + o_p(1), \end{aligned} \quad (\text{W.3})$$

where the last equality is obtained by the uniform consistency of  $\hat{\beta}(v)$  on  $v \in [a, b] \subset (0, 1)$ , the uniform consistency  $n^{-1}U'_{ipw}(v, \beta^*(v), \hat{\psi}) \xrightarrow{P} -\Sigma(v)$  in  $v \in [a, b]$ , and the convergence in distribution of  $n^{-1/2}h^{1/2}U_{ipw}(v, \beta, \hat{\psi})$  to  $N(0, \nu_0\Sigma^*(v))$  which we show next.

In the rest of the proof, we set  $\beta = \beta(v)$  for simplicity. Under Condition A, using a second order Taylor expansion for  $\lambda_k(t, u|Z_i(t))$  in the neighborhood of  $v$ , we have

$$\begin{aligned} & n^{-1/2} \sum_{k=1}^K \sum_{i=1}^{n_k} \int_0^1 \int_0^\tau K_h(u-v)[Z_{ki}(t) - \tilde{Z}_k(t, \beta, \hat{\psi}_k)] \frac{R_{ki}}{\pi_k(Q_{ki}, \hat{\psi}_k)} \\ & \quad Y_{ki}(t)[\lambda_k(t, u|Z_{ki}(t)) - \lambda_k(t, v|Z_{ki}(t))] dt du \\ & = \frac{1}{2} \mu_2 n^{1/2} h^2 \vartheta(v) + o_p(n^{1/2} h^2), \end{aligned}$$

uniformly in  $v \in [0, 1]$ . It follows that

$$\begin{aligned} & n^{-1/2} U_{ipw}(v, \beta, \hat{\psi}) \\ & = n^{-1/2} \sum_{k=1}^K \sum_{i=1}^{n_k} \int_0^1 \int_0^\tau K_h(u-v)[Z_{ki}(t) - \tilde{Z}_k(t, \beta, \hat{\psi}_{k0})] \frac{R_{ki}}{\pi_k(Q_{ki}, \hat{\psi}_k)} \\ & \quad [N_{ki}(dt, du) - Y_{ki}(t)\lambda_k(t, v|Z_{ki}(t)) dt du] \\ & = n^{-1/2} \sum_{k=1}^K \sum_{i=1}^{n_k} \int_0^1 \int_0^\tau K_h(u-v)[Z_{ki}(t) - \tilde{Z}_k(t, \beta, \hat{\psi}_k)] \frac{R_{ki}}{\pi_k(Q_{ki}, \hat{\psi}_{k0})} \\ & \quad [N_{ki}(dt, du) - Y_{ki}(t)\lambda_k(t, u|Z_{ki}(t)) dt du] + \frac{1}{2} \mu_2 n^{1/2} h^2 \vartheta(v) + o_p(n^{1/2} h^2), \end{aligned} \quad (\text{W.4})$$

uniformly in  $v \in [0, 1]$ .

Let

$$n^{-1/2} H_k(t, v) = n_k^{-1/2} \sum_{i=1}^{n_k} \frac{R_{ki}}{\pi_k(Q_{ki}, \hat{\psi}_k)} M_{ki}(t, v). \quad (\text{W.5})$$

By the first order Taylor expansion in  $\hat{\psi}_k$ ,

$$\begin{aligned} n^{-1/2} H_k(t, v) & = n_k^{-1/2} \sum_{i=1}^{n_k} \frac{R_{ki}}{\pi_k(Q_{ki}, \psi_{k0})} M_{ki}(t, v) \\ & \quad - \frac{R_{ki}}{(\pi_k(Q_{ki}, \psi_{k0}))^2} \left( \frac{\partial \pi_k(Q_{ki}, \psi_{k0})}{\partial \psi_k} \right)^T M_{ki}(t, v) (\hat{\psi}_k - \psi_{k0}) + o_p(1) \\ & = n_k^{-1/2} \sum_{i=1}^{n_k} \frac{R_{ki}}{\pi_k(Q_{ki}, \psi_{k0})} M_{ki}(t, v) \\ & \quad - n_k^{-1} \sum_{i=1}^{n_k} \frac{R_{ki}}{(\pi_k(Q_{ki}, \psi_{k0}))^2} \left( \frac{\partial \pi_k(Q_{ki}, \psi_{k0})}{\partial \psi_k} \right)^T M_{ki}(t, v) \\ & \quad \times n_k^{-1/2} \sum_{i=1}^{n_k} (I_k^\psi)^{-1} S_{ki}^\psi + o_p(1), \end{aligned}$$

where  $S_{ki}^\psi$  and  $I_k^\psi$  are defined in (17) and (18). Following the proof of Lemma 2 in Sun *et al.* (2009), it is easy to show that  $n_k^{-1/2}H_k(t, v)$  converges weakly to a mean-zero Gaussian process. By Condition A,  $\|\tilde{S}_k^{(j)}(t, \beta, \hat{\psi}_k) - s_k^{(j)}(t, \beta)\| = o_p(n^{-1/2+\delta})$ , uniformly in  $t$  for  $j = 0, 1$ , for  $0 < \delta < 1/2$ . Note that  $h = n^{-\alpha}$  with  $\alpha < 1/2$ . We can choose  $\delta > 0$  such that  $\alpha + \delta < 1/2$ . Thus  $n^{-1/2+\delta}h^{-1/2} = o(h^{1/2})$ . We have  $h^{1/2}K_h(u - v)\|\tilde{S}_k^{(j)}(t, \beta, \hat{\psi}_k) - s_k^{(j)}(t, \beta)\|$  goes in probability to zero. Applying Lemma 2 of Gilbert *et al.* (2008),

$$\begin{aligned}
& n^{-1/2}h^{1/2}U_{ipw}(v, \beta(v), \hat{\psi}) \\
&= n^{-1/2}h^{1/2} \sum_{k=1}^K \sum_{i=1}^{n_k} \int_0^1 \int_0^\tau K_h(u - v)[Z_{ki}(t) - \bar{z}_k(t, \beta)] \frac{R_{ki}}{\pi_k(Q_{ki}, \hat{\psi}_k)} \\
&\quad [N_{ki}(dt, du) - Y_{ki}(t)\lambda_k(t, u|Z_{ki}(t)) dtdu] \\
&\quad + \frac{1}{2}\mu_2 n^{1/2}h^{5/2}\vartheta(v) + o_p(n^{1/2}h^{5/2}) + o_p(h^{1/2}) \tag{W.6} \\
&= n^{-1/2}h^{1/2} \sum_{k=1}^K \sum_{i=1}^{n_k} \int_0^1 \int_0^\tau K_h(u - v)[Z_{ki}(t) - \bar{z}_k(t, \beta(u))] \frac{R_{ki}}{\pi_k(Q_{ki}, \hat{\psi}_k)} \\
&\quad [N_{ki}(dt, du) - Y_{ki}(t)\lambda_k(t, u|Z_{ki}(t)) dtdu] \\
&\quad + \frac{1}{2}\mu_2 n^{1/2}h^{5/2}\vartheta(v) + o_p(n^{1/2}h^{5/2}) + o_p(h^{1/2}) \\
&= n^{-1/2}h^{1/2} \sum_{k=1}^K \sum_{i=1}^{n_k} \mathcal{A}_{ki} + h^{1/2} \sum_{k=1}^K (n_k/n)^{1/2} \mathcal{D}_k \sqrt{n_k}(\hat{\psi}_k - \psi_{k0}) \\
&\quad + \frac{1}{2}\mu_2 n^{1/2}h^{5/2}\vartheta(v) + o_p(n^{1/2}h^{5/2}) + o_p(h^{1/2}),
\end{aligned}$$

where  $\mathcal{A}_{ki}$  and  $\mathcal{D}_k$  is defined in (19). Note that  $\hat{\psi}_k - \psi_{k0} = n_k^{-1} \sum_{i=1}^{n_k} (I_k^\psi)^{-1} S_{ki}^\psi + o_p(n_k^{-1/2})$ .

We have

$$\begin{aligned}
& n^{-1/2}h^{1/2}U_{ipw}(v, \beta(v), \hat{\psi}) \\
&= n^{-1/2}h^{1/2} \sum_{k=1}^K \sum_{i=1}^{n_k} \mathcal{A}_{ki} + n^{-1/2}h^{1/2} \sum_{k=1}^K \sum_{i=1}^{n_k} \mathcal{D}_k (I_k^\psi)^{-1} S_{ki}^\psi \tag{W.7} \\
&\quad + \frac{1}{2}\mu_2 n^{1/2}h^{5/2}\vartheta(v) + o_p(n^{1/2}h^{5/2}) + o_p(h^{1/2}).
\end{aligned}$$

It follows that

$$\begin{aligned}
& n^{-1/2}h^{1/2}U_{ipw}(v, \beta(v), \hat{\psi}) \\
&= n^{-1/2}h^{1/2} \sum_{k=1}^K \sum_{i=1}^{n_k} \int_0^1 \int_0^\tau K_h(u - v)[Z_{ki}(t) - \bar{z}_k(t, \beta(u))] \\
&\quad \left[ \frac{R_{ki}}{\pi_k(t, Z_{ki}, \delta_{ki}A_{ki}, \psi_{k0})} M_{ki}^*(dt, du) + \frac{R_{ki}}{\pi_k(t, Z_{ki}, \delta_{ki}A_{ki}, \psi_{k0})} \lambda_{ki}^*(t, u) Y_{ki}(t) dtdu \right]
\end{aligned}$$

$$\begin{aligned}
& - \frac{R_{ki}}{\pi_k(Q_{ki}, \psi_{k0})} \lambda_k(t, u | Z_{ki}(t)) Y_{ki}(t) dt du \Big] \\
& + n^{-1/2} h^{1/2} \sum_{k=1}^K \sum_{i=1}^{n_k} \mathcal{D}_k(I_k^\psi)^{-1} S_{ki}^\psi + \frac{1}{2} \mu_2 n^{1/2} h^{5/2} \vartheta(v) + o_p(n^{1/2} h^{5/2}) + o_p(h^{1/2}) \\
= & h^{1/2} \int_0^1 K_h(u-v) \tilde{W}_n(du) + h^{1/2} \int_0^1 K_h(u-v) \delta_n(du) \\
& + n^{-1/2} h^{1/2} \sum_{k=1}^K \sum_{i=1}^{n_k} \mathcal{D}_k(I_k^\psi)^{-1} S_{ki}^\psi \\
& + \frac{1}{2} \mu_2 n^{1/2} h^{5/2} \vartheta(v) + o_p(n^{1/2} h^{5/2}) + o_p(h^{1/2}) + o_p(1)
\end{aligned} \tag{W.8}$$

where

$$\begin{aligned}
\tilde{W}_n(v) &= n^{-1/2} \sum_{k=1}^K \sum_{i=1}^{n_k} \int_0^v \int_0^\tau [Z_{ki}(t) - \bar{z}_k(t, \beta(u))] \frac{R_{ki}}{\pi_k(t, Z_{ki}, \delta_{ki} A_{ki}, \psi_{k0})} M_{ki}^*(dt, du) \\
\delta_n(v) &= n^{-1/2} \sum_{k=1}^K \sum_{i=1}^{n_k} \int_0^v \int_0^\tau [Z_{ki}(t) - \bar{z}_k(t, \beta(u))] \\
& \quad \left\{ \frac{R_{ki}}{\pi_k(t, Z_{ki}, \delta_{ki} A_{ki}, \psi_{k0})} \lambda_{ki}^*(t, u) - \frac{R_{ki}}{\pi_k(Q_{ki}, \psi_{k0})} \lambda_k(t, u | Z_{ki}(t)) \right\} Y_{ki}(t) dt du.
\end{aligned}$$

It is easy to see that the third term in (W.8) is  $O_p(h^{1/2})$ . Now we check that the expectation of each term in the summand of  $\delta_n(v)$  is zero. Applying double expectation  $E(\cdot) = E[E(\cdot | Q_{ki}, Y_{ki}(t))]$ , we have

$$E \left\{ [Z_{ki}(t) - \bar{z}_k(t, \beta(u))] \frac{R_{ki}}{\pi_k(Q_{ki}, \psi_{k0})} \lambda_k(t, u | Z_{ki}(t)) Y_{ki}(t) \right\} = 0.$$

By (16), we have

$$\begin{aligned}
& E \left\{ [Z_{ki}(t) - \bar{z}_k(t, \beta(u))] \frac{R_{ki}}{\pi_k(t, Z_{ki}, \delta_{ki} A_{ki}, \psi_{k0})} \lambda_{ki}^*(t, u) Y_{ki}(t) \right\} dt du \\
&= E \left\{ [Z_{ki}(t) - \bar{z}_k(t, \beta(u))] \frac{R_{ki}}{\pi_k(t, Z_{ki}, \delta_{ki} A_{ki}, \psi_{k0})} N_{ki}(dt, du) \right\} \\
&= E \left\{ [Z_{ki}(t) - \bar{z}_k(t, \beta(u))] \frac{R_{ki}}{\pi_k(W_{ki}, \psi_{k0})} N_{ki}(dt, du) \right\} \\
&= E \left\{ [Z_{ki}(t) - \bar{z}_k(t, \beta(u))] E \left[ \frac{R_{ki}}{\pi_k(W_{ki}, \psi_{k0})} \middle| W_{ki}, \delta_{ki} \right] N_{ki}(dt, du) \right\} \\
&= E \left\{ [Z_{ki}(t) - \bar{z}_k(t, \beta(u))] N_{ki}(dt, du) \right\} = 0.
\end{aligned} \tag{W.9}$$

By Lemma 1 of Sun & Wu (2005), the process  $\delta_n(v)$ ,  $0 \leq v \leq 1$ , converges weakly to a mean-zero Gaussian process and consequently, the second term in (W.8) converges to zero in probability.

Following the proof of Theorem 1 of Sun & Wu (2005),  $\tilde{W}_n(v) \xrightarrow{\mathcal{D}} W(v)$ , where  $W(v)$  is a  $p$ -dimensional mean-zero Gaussian martingale with continuous sample path on  $[0, 1]$ . The covariance matrix of  $W(v)$  is  $\int_0^v \Sigma^*(u) du$ .

By the almost sure representation theorem (Shorack & Wellner, 1986, p.47), there exist  $\tilde{W}_n^*(v)$  and  $W^*(v)$  on some probability space with the same distributions and sample paths as  $\tilde{W}_n(v)$  and  $W(v)$ , respectively, such that  $\tilde{W}_n^*(v) \xrightarrow{\text{a.s.}} W^*(v)$  uniformly in  $v \in [0, 1]$ . Hence  $\int_0^1 K_h(u-v) \tilde{W}_n^*(du) = \int_0^1 K_h(u-v) W^*(du) + O_p(n^{-1/2}h^{-1})$  by integration by parts since  $K(\cdot)$  has bounded variation. It follows that

$$\begin{aligned} h^{1/2} \int_0^1 K_h(u-v) \tilde{W}_n(du) &\stackrel{\mathcal{D}}{=} h^{1/2} \int_0^1 K_h(u-v) \tilde{W}_n^*(du) \\ &= h^{1/2} \int_0^1 K_h(u-v) W^*(du) + O_p(n^{-1/2}h^{-1/2}). \end{aligned}$$

Since  $W^*(v)$  is a Gaussian martingale with covariance matrix of  $\int_0^v \Sigma^*(u) du$ ,  $h^{1/2} \int_0^1 K_h(u-v) W^*(du)$  is a mean zero Gaussian random vector with covariance matrix equal to  $h \int_0^1 K_h^2(u-v) \Sigma^*(u) du \rightarrow \nu_0 \Sigma^*(v)$  as  $h \rightarrow 0$ . Hence,  $h^{1/2} \int_0^1 K_h(u-v) \tilde{W}_n(du) \xrightarrow{\mathcal{D}} N(0, \nu_0 \Sigma^*(v))$  as  $h \rightarrow 0$ ,  $nh \rightarrow \infty$ . By the Slutsky theorem,  $n^{-1/2} h^{1/2} U_{ipw}(v, \beta, \psi_0) - \frac{1}{2} \mu_2 n^{1/2} h^{5/2} \vartheta(v)$  converges weakly to  $N(0, \nu_0 \Sigma^*(v))$  as  $nh^2 \rightarrow \infty$  and  $nh^5 = O(1)$ . It follows from (W.3) that  $(nh)^{1/2} [\hat{\beta}^{ipw}(v) - \beta(v) + \frac{1}{2} \mu_2 h^2 \vartheta(v)] \xrightarrow{\mathcal{D}} N(0, \nu_0 \Sigma(v)^{-1} \Sigma^*(v) \Sigma(v)^{-1})$  as  $nh^2 \rightarrow \infty$  and  $nh^5 = O(1)$ .  $\square$

### PROOF OF THEOREM 3.

Suppose  $\hat{g}_k(a|t, u, z) \xrightarrow{P} g_k^*(t, u, z)$  under the parametric model  $g_k(a|t, u, z, \gamma_k)$ . Let

$$\rho_k^*(v, w) = \int_0^v \lambda_k(t, u|z) g_k^*(a|t, u, z) du / \int_0^1 \lambda_k(t, u|z) g_k^*(a|t, u, z) du,$$

$$\begin{aligned} &\eta_n(u, \theta, \hat{\psi}, \hat{\rho}^{ipw}(\cdot)) \\ &= n^{-1} \sum_{k=1}^K \sum_{i=1}^{n_k} \int_0^u \int_0^\tau (Z_{ki}(t) - \bar{Z}_k(t, \theta)) \\ &\quad \left\{ \frac{R_{ki}}{\pi_k(Q_{ki}, \hat{\psi}_k)} N_{ki}(dt, dx) + \left(1 - \frac{R_{ki}}{\pi_k(Q_{ki}, \hat{\psi}_k)}\right) N_{ki}^x(dt) d(\hat{\rho}_k^{ipw}(x, W_{ki})) \right\}, \end{aligned} \tag{W.10}$$

$$\begin{aligned} &\xi_n(u, \theta, \psi_0, \rho^*(\cdot)) \\ &= n^{-1} \sum_{k=1}^K \sum_{i=1}^{n_k} \int_0^u \int_0^\tau (Z_{ki}(t) - \bar{z}_k(t, \theta)) \\ &\quad \left\{ \frac{R_{ki}}{\pi_k(Q_{ki}, \psi_{k0})} N_{ki}(dt, dx) + \left(1 - \frac{R_{ki}}{\pi_k(Q_{ki}, \psi_{k0})}\right) N_{ki}^x(dt) d(\rho_k^*(x, W_{ki})) \right\}. \end{aligned} \tag{W.11}$$

By the conditions of Theorem 3,  $\eta_n(v, \theta, \hat{\psi}, \hat{\rho}^{ipw}(\cdot)) = \xi_n(v, \theta, \psi_0, \rho^*(\cdot)) + O_p(n^{-1/2})$ , uniformly in  $v \in [0, 1]$  and

$$\begin{aligned} n^{-1}U_{aug}(v, \theta, \hat{\psi}, \hat{\rho}^{ipw}(\cdot)) &= \int_0^1 K_h(u-v)\eta_n(du, \theta, \hat{\psi}, \hat{\rho}^{ipw}(\cdot)) \\ &= \int_0^1 K_h(u-v)\xi_n(du, \theta, \psi_0, \rho^*(\cdot)) + O_p(n^{-1/2}h^{-1}), \end{aligned}$$

uniformly in  $(v, \theta) \in [0, 1] \times [-M, M]$ , for  $M > 0$ .

By application of the Glivenko–Cantelli and Donsker theorems, similar to the proofs of Lemma 2 and Theorem 1 of Sun *et al.* (2009),  $\xi_n(v, \theta, \psi_0, \rho^*(\cdot)) = \xi(v, \theta, \psi_0, \rho^*(\cdot)) + O_p(n^{-1/2})$ , uniformly in  $(v, \theta) \in [0, 1] \times [-M, M]$ , with

$$\begin{aligned} &\xi(v, \theta, \psi_0, \rho^*(\cdot)) \\ &= \sum_{k=1}^K p_k E \left[ \int_0^v \int_0^\tau (Z_{ki}(t) - \bar{z}_k(t, \theta)) \right. \\ &\quad \left. \left\{ \frac{R_{ki}}{\pi_k(Q_{ki}, \psi_{k0})} N_{ki}(dt, du) + \left( 1 - \frac{R_{ki}}{\pi_k(Q_{ki}, \psi_{k0})} \right) N_{ki}^x(dt) d(\rho_k^*(u, W_{ki})) \right\} \right] \\ &= \sum_{k=1}^K p_k \left[ E \left\{ \int_0^v \int_0^\tau (Z_{ki}(t) - \bar{z}_k(t, \theta)) N_{ki}(dt, du) \right\} \right. \\ &\quad \left. - E \left\{ \int_0^v \int_0^\tau (Z_{ki}(t) - \bar{z}_k(t, \theta)) \left( 1 - \frac{R_{ki}}{\pi_k(Q_{ki}, \psi_{k0})} \right) \right. \right. \\ &\quad \left. \left. N_{ki}^x(dt) [N_{ki}^v(du) - d(\rho_k^*(u, W_{ki}))] \right\} \right]. \tag{W.12} \end{aligned}$$

The first expectation is zero under model (2) by Sun *et al.* (2009). Using the double expectation formula  $E[\cdot] = E\{E[\cdot | V_{ki}, W_{ki}, \delta_{ki}]\}$  and the missing at random assumption (3), the second expectation is zero if  $r_k(W_{ki}, \psi_k)$  or  $g_k(a|t, v, z, \gamma_k)$  is correctly specified which leads to  $\rho_k^*(v, w) = \rho_k(v, w)$ . It follows that

$$n^{-1}U_{aug}(v, \theta, \hat{\psi}, \hat{\rho}^{ipw}(\cdot)) = \int_0^1 K_h(u-v)\xi(du, \theta, \psi_0, \rho(\cdot)) + O_p(n^{-1/2}h^{-1}) = o_p(1),$$

uniformly in  $(v, \theta) \in [a, b] \times [-M, M]$  for  $M > 0$ . By Lemma 2,  $\hat{\beta}(v) \xrightarrow{P} \beta(v)$  uniformly in  $v \in [a, b]$  as  $nh^2 \rightarrow \infty$ .  $\square$

#### PROOF OF THEOREM 4.

By a Taylor expansion,  $U_{aug}(v, \hat{\beta}^{aug}(v), \hat{\psi}, \hat{\rho}^{ipw}(\cdot)) - U_{aug}(v, \beta(v), \hat{\psi}, \hat{\rho}^{ipw}(\cdot)) = U'_{aug}(v, \beta^*(v), \hat{\psi}, \hat{\rho}^{ipw}(\cdot)) (\hat{\beta}^{aug}(v) - \beta(v))$ , where  $\beta^*(v)$  is on the line segment between  $\hat{\beta}(v)$  and  $\beta(v)$ . Hence,

$$n^{1/2}h^{1/2}(\hat{\beta}^{aug}(v) - \beta(v))$$



$$= -(U'_{aug}(v, \beta^*(v), \hat{\psi}, \hat{\rho}^{ipw}(\cdot))/n)^{-1} n^{-1/2} h^{1/2} U_{aug}(v, \beta(v), \hat{\psi}, \hat{\rho}^{ipw}(\cdot)). \quad (\text{W.13})$$

By Condition A and the uniform consistency of  $\hat{\beta}^{aug}(v)$  on  $v \in [a, b] \subset (0, 1)$ ,  $n^{-1} U'_{aug}(v, \beta^*(v), \hat{\psi}, \hat{\rho}^{ipw}(\cdot)) = -\Sigma(v) + o_p(1)$ , uniformly in  $v \in [a, b]$ .

Next we study the asymptotic property of  $n^{-1/2} h^{1/2} U_{aug}(v, \beta, \hat{\psi}, \hat{\rho}^{ipw}(\cdot))$ . Let  $g_n(W_{ki}, v) = \int_0^1 K_h(u - v) d(\hat{\rho}_k(u, W_{ki}) - \rho_k(W_{ki}, u))$  and

$$C = n^{-1/2} h^{1/2} \sum_{k=1}^K \sum_{i=1}^{n_k} g_n(W_{ki}, v) \int_0^\tau (Z_{ki}(t) - \bar{Z}_k(t, \beta)) \left(1 - \frac{R_{ki}}{\pi_k(Q_{ki}, \hat{\psi}_k)}\right) N_{ki}^x(dt).$$

It follows that  $g_n(W_{ki}, v) \xrightarrow{P} 0$  uniformly in  $W_{ki}$  for  $v \in [a, b]$ . By the Taylor expansion of  $\hat{\psi}_k$  around  $\psi_{k0}$ ,

$$\begin{aligned} C &= n^{-1/2} h^{1/2} \sum_{k=1}^K \sum_{i=1}^{n_k} g_n(W_{ki}, v) \zeta_{ki} \\ &\quad + n^{-1/2} h^{1/2} \sum_{k=1}^K \sum_{i=1}^{n_k} g_n(W_{ki}, v) \int_0^\tau (Z_{ki}(t) - \bar{Z}_k(t, \beta)) N_{ki}^x(dt) \\ &\quad \frac{R_{ki}}{(\pi_k(Q_{ki}, \psi_{k0}))^2} \left( \frac{\partial \pi_k(Q_{ki}, \psi_{k0})}{\partial \psi_k} \right)^T (\hat{\psi}_k - \psi_{k0}) + o_p(1), \end{aligned}$$

where

$$\zeta_{ki} = \int_0^\tau (Z_{ki}(t) - \bar{Z}_k(t, \beta)) \left(1 - \frac{R_{ki}}{\pi_k(Q_{ki}, \psi_{k0})}\right) N_{ki}^x(dt).$$

The first term of  $C$  is  $o_p(h^{1/2})$  by Lemma 3. The second term of  $C$  is at the order of  $o_p(h^{1/2})$  since  $n_k^{1/2}(\hat{\psi}_k - \psi_{k0}) = O_p(1)$ , and  $g_n(W_{ki}, v) \xrightarrow{P} 0$  uniformly in  $W_{ki}$ . Hence  $C = o_p(h^{1/2})$ .

Note that

$$\begin{aligned} &n^{-1/2} h^{1/2} U_{aug}(v, \beta, \hat{\psi}, \hat{\rho}^{ipw}(\cdot)) \\ &= n^{-1/2} h^{1/2} \sum_{k=1}^K \sum_{i=1}^{n_k} \int_0^1 \int_0^\tau K_h(u - v) (Z_{ki}(t) - \bar{Z}_k(t, \beta)) \left\{ \frac{R_{ki}}{\pi_k(Q_{ki}, \hat{\psi}_k)} N_{ki}(dt, du) \right. \\ &\quad \left. + \left(1 - \frac{R_{ki}}{\pi_k(Q_{ki}, \hat{\psi}_k)}\right) N_{ki}^x(dt) d(\hat{\rho}_k(u, W_{ki})) \right\} \\ &= n^{-1/2} h^{1/2} \sum_{k=1}^K \sum_{i=1}^{n_k} \int_0^1 \int_0^\tau K_h(u - v) (Z_{ki}(t) - \bar{Z}_k(t, \beta)) \left\{ \frac{R_{ki}}{\pi_k(Q_{ki}, \hat{\psi}_k)} N_{ki}(dt, du) \right. \\ &\quad \left. + \left(1 - \frac{R_{ki}}{\pi_k(Q_{ki}, \hat{\psi}_k)}\right) N_{ki}^x(dt) d(\rho_k(u, W_{ki})) \right\} + C \\ &= n^{-1/2} h^{1/2} \sum_{k=1}^K \sum_{i=1}^{n_k} \int_0^1 \int_0^\tau K_h(u - v) (Z_{ki}(t) - \bar{Z}_k(t, \beta)) \left\{ \frac{R_{ki}}{\pi_k(Q_{ki}, \hat{\psi}_k)} M_{ki}(dt, du) \right. \end{aligned}$$

$$\begin{aligned}
& + \left( 1 - \frac{R_{ki}}{\pi_k(Q_{ki}, \hat{\psi}_k)} \right) E\{M_{ki}(dt, du)|Q_{ki}\} \} \\
& + n^{-1/2} h^{1/2} \sum_{k=1}^K \sum_{i=1}^{n_k} \int_0^1 \int_0^\tau K_h(u-v)(Z_{ki}(t) - \bar{Z}_k(t, \beta)) Y_{ki}(t) \lambda_{ki}(t, u) dt du + C.
\end{aligned} \tag{W.14}$$

Since  $h^{1/2} K_h(u-v)[\bar{Z}_k(t, \beta) - \bar{z}_k(t, \beta(u))] \xrightarrow{P} 0$  uniformly in  $u \in [a, b]$ , applying Lemma 2 of Gilbert *et al.* (2008), we can replace  $\bar{Z}_k(t, \beta)$  with  $\bar{z}_k(t, \beta(u))$  in the first two integrations.

Hence

$$\begin{aligned}
& n^{-1/2} h^{1/2} U_{aug}(v, \beta, \hat{\psi}, \hat{\rho}^{ipw}(\cdot)) \\
& = n^{-1/2} h^{1/2} \sum_{k=1}^K \sum_{i=1}^{n_k} \int_0^1 \int_0^\tau K_h(u-v)(Z_{ki}(t) - \bar{z}_k(t, \beta(u))) \left\{ \frac{R_{ki}}{\pi_k(Q_{ki}, \hat{\psi}_k)} M_{ki}(dt, du) \right. \\
& \quad \left. + \left( 1 - \frac{R_{ki}}{\pi_k(Q_{ki}, \hat{\psi}_k)} \right) E\{M_{ki}(dt, du)|Q_{ki}\} \right\} \\
& + n^{-1/2} h^{1/2} \sum_{k=1}^K \sum_{i=1}^{n_k} \int_0^1 \int_0^\tau K_h(u-v)(Z_{ki}(t) - \bar{Z}_k(t, \beta)) Y_{ki}(t) \lambda_{ki}(t, u) dt du + o_p(h^{1/2}) \\
& \equiv I + II + III + o_p(h^{1/2}).
\end{aligned} \tag{W.15}$$

By  $\lambda_{ki}(t, u) = \lambda_{ki}(t, v) + (\lambda_{ki}(t, u) - \lambda_{ki}(t, v))$  and applying Taylor expansion, the third term is

$$\begin{aligned}
III & = n^{-1/2} h^{1/2} \sum_{k=1}^K \sum_{i=1}^{n_k} \int_0^1 \int_0^\tau K_h(u-v)(Z_{ki}(t) - \bar{Z}_k(t, \beta)) Y_{ki}(t) \lambda_{ki}(t, u) dt du \\
& = \frac{1}{2} \mu_2 n^{1/2} h^{5/2} \vartheta(v) + o_p(n^{1/2} h^{5/2}) + o_p(h^{1/2}).
\end{aligned}$$

Applying Taylor expansion at  $\psi_{k0}$ ,

$$\begin{aligned}
I + II & = n^{-1/2} h^{1/2} \sum_{k=1}^K \sum_{i=1}^{n_k} (\mathcal{A}_{ki} + \mathcal{B}_{ki}) \\
& + n^{-1/2} h^{1/2} \sum_{k=1}^K \sum_{i=1}^{n_k} \int_0^1 \int_0^\tau K_h(u-v)(Z_{ki}(t) - \bar{z}_k(t, \beta(u))) \\
& \quad \left\{ \frac{-R_{ki}}{(\pi_k(Q_{ki}, \psi_{k0}))^2} \frac{\partial \pi_k(Q_{ki}, \psi_{k0})}{\partial \psi_k} M_{ki}(dt, du) \right. \\
& \quad \left. - \frac{-R_{ki}}{(\pi_k(Q_{ki}, \psi_{k0}))^2} \frac{\partial \pi_k(Q_{ki}, \psi_{k0})}{\partial \psi_k} E\{M_{ki}(dt, du)|Q_{ki}\} \right\} (\hat{\psi}_k - \psi_{k0}) + o_p(h^{1/2}).
\end{aligned} \tag{W.16}$$

By the missing at random assumption (3),  $R_{ki}$  and  $M_{ki}(t, v)$  are independent conditioning on  $Q_{ki}$ . It follows that

$$E \left\{ \frac{-R_{ki}}{(\pi_k(Q_{ki}, \psi_{k0}))^2} \frac{\partial \pi_k(Q_{ki}, \psi_{k0})}{\partial \psi_k} M_{ki}(dt, du) \right.$$

$$+ \frac{R_{ki}}{(\pi_k(Q_{ki}, \psi_{k0}))^2} \frac{\partial \pi_k(Q_{ki}, \psi_{k0})}{\partial \psi_k} E\{M_{ki}(dt, du) | Q_{ki}\} \} = 0.$$

By the central limit theorem, the last term in (W.16) is  $o_p(h^{1/2})$ . Hence

$$I + II = n^{-1/2} h^{1/2} \sum_{k=1}^K \sum_{i=1}^{n_k} (\mathcal{A}_{ki} + \mathcal{B}_{ki}) + o_p(h^{1/2}).$$

By (W.15) and (W.16), we have

$$\begin{aligned} n^{-1/2} h^{1/2} U_{aug}(v, \beta, \hat{\psi}) &= n^{-1/2} h^{1/2} \sum_{k=1}^K \sum_{i=1}^{n_k} (\mathcal{A}_{ki} + \mathcal{B}_{ki}) \\ &+ \frac{1}{2} \mu_2 n^{1/2} h^{5/2} \vartheta(v) + o_p(n^{1/2} h^{5/2}) + o_p(h^{1/2}). \end{aligned} \quad (\text{W.17})$$

Since  $n^{-1/2} h^{1/2} \sum_{k=1}^K \sum_{i=1}^{n_k} \mathcal{B}_{ki} = O_p(h^{1/2})$ , it follows from (W.7) and (W.8) that

$$\begin{aligned} &n^{-1/2} h^{1/2} U_{aug}(v, \beta, \hat{\psi}, \hat{\rho}^{ipw}(\cdot)) \\ &= h^{1/2} \int_0^1 K_h(u-v) \tilde{W}_n(du) + h^{1/2} \int_0^1 K_h(u-v) \delta_n(du) \\ &+ \frac{1}{2} \mu_2 n^{1/2} h^{5/2} \vartheta(v) + O_p(h^{1/2}) + o_p(n^{1/2} h^{5/2}). \end{aligned} \quad (\text{W.18})$$

By the Slutsky theorem,  $n^{-1/2} h^{1/2} U_{aug}(v, \beta, \psi_0) - \frac{1}{2} \mu_2 n^{1/2} h^{5/2} \vartheta(v)$  converges weakly to  $N(0, \nu_0 \Sigma^*(v))$  as  $nh^2 \rightarrow \infty$  and  $nh^5 = O(1)$ . It follows from (W.18) that  $(nh)^{1/2} [\hat{\beta}^{aug}(v) - \beta(v) + \frac{1}{2} \mu_2 h^2 \Sigma^{-1}(v) \vartheta(v)] \xrightarrow{\mathcal{D}} N(0, \nu_0 \Sigma(v)^{-1} \Sigma^*(v) \Sigma(v)^{-1})$  as  $nh^2 \rightarrow \infty$  and  $nh^5 = O(1)$ .

We now show that  $\hat{\beta}^{aug}(v)$  is more efficient than  $\hat{\beta}^{ipw}(v)$ . By (W.17), we have,

$$\begin{aligned} &(nh)^{1/2} [\hat{\beta}^{aug}(v) - \beta(v) + \frac{1}{2} \mu_2 h^2 \Sigma^{-1}(v) \vartheta(v)] \\ &= -(\Sigma(v))^{-1} n^{-1/2} h^{1/2} \sum_{k=1}^K \sum_{i=1}^{n_k} (\mathcal{A}_{ki} + \mathcal{B}_{ki}) + o_p(n^{1/2} h^{5/2}) + o_p(h^{1/2}). \end{aligned} \quad (\text{W.19})$$

Let  $\mathcal{O}_{ki} = \mathcal{D}_k(I_k^\psi)^{-1} S_{ki}^\psi$ . Then by (W.7),

$$\begin{aligned} n^{-1/2} h^{1/2} U_{ipw}(v, \beta, \hat{\psi}) &= n^{-1/2} h^{1/2} \sum_{k=1}^K \sum_{i=1}^{n_k} \mathcal{A}_{ki} + n^{-1/2} h^{1/2} \sum_{k=1}^K \sum_{i=1}^{n_k} \mathcal{O}_{ki} \\ &+ \frac{1}{2} \mu_2 n^{1/2} h^{5/2} \vartheta(v) + o_p(n^{1/2} h^{5/2}) + o_p(h^{1/2}). \end{aligned}$$

Thus,

$$(nh)^{1/2} [\hat{\beta}^{ipw}(v) - \beta(v) + \frac{1}{2} \mu_2 h^2 \Sigma^{-1}(v) \vartheta(v)]$$

$$\begin{aligned}
&= -(\Sigma(v))^{-1}n^{-1/2}h^{1/2} \sum_{k=1}^K \sum_{i=1}^{n_k} (\mathcal{A}_{ki} + \mathcal{O}_{ki}) + o_p(n^{1/2}h^{5/2}) + o_p(h^{1/2}) \\
&= -(\Sigma(v))^{-1}n^{-1/2}h^{1/2} \sum_{k=1}^K \sum_{i=1}^{n_k} [(\mathcal{A}_{ki} + \mathcal{B}_{ki}) + (\mathcal{O}_{ki} - \mathcal{B}_{ki})] + o_p(n^{1/2}h^{5/2}) + o_p(h^{1/2}).
\end{aligned}$$

Next we show that  $Cov\{\mathcal{A}_{ki} + \mathcal{B}_{ki}, \mathcal{O}_{ki} - \mathcal{B}_{ki}\} = 0$ . This will be followed by

$$\begin{aligned}
&Cov\{(nh)^{1/2}[\hat{\beta}^{ipw}(v) - \beta(v) + \frac{1}{2}\mu_2 h^2 \Sigma^{-1}(v)\vartheta(v)]\} \\
&= Cov\{(nh)^{1/2}[\hat{\beta}^{aug}(v) - \beta(v) + \frac{1}{2}\mu_2 h^2 \Sigma^{-1}(v)\vartheta(v)]\} \\
&\quad + h\Sigma^{-1}(v) \sum_{k=1}^K \frac{n_k}{n} Cov\{\mathcal{O}_{k1} - \mathcal{B}_{k1}\} \Sigma^{-1}(v) + o_p(nh^5) + o_p(h).
\end{aligned}$$

By the missing at random assumption (3), conditional on  $Q_{ki}$ ,  $R_{ki}$  and  $M_{ki}(t, v)$  are independent. We have

$$\begin{aligned}
&Cov(\mathcal{A}_{ki}, \mathcal{B}_{ki}) \\
&= E \left\{ \int_0^1 \int_0^\tau \int_0^1 \int_0^\tau K_h(u_1 - v) K_h(u_2 - v) (Z_{ki}(t) - \bar{z}_k(t, \beta(u_1)))(Z_{ki}(t) - \bar{z}_k(t, \beta(u_2)))^T \right. \\
&\quad \left. \frac{R_{ki}}{\pi_k(Q_{ki}, \psi_{k0})} \left( 1 - \frac{R_{ki}}{\pi_k(Q_{ki}, \psi_{k0})} \right) M_{ki}(dt, du_1) E\{M_{ki}(dt, du_2) | Q_{ki}\} \right\} \\
&= E \left\{ \int_0^1 \int_0^\tau \int_0^1 \int_0^\tau K_h(u_1 - v) K_h(u_2 - v) (Z_{ki}(t) - \bar{z}_k(t, \beta(u_1)))(Z_{ki}(t) - \bar{z}_k(t, \beta(u_2)))^T \right. \\
&\quad \left. E \left[ \frac{R_{ki}}{\pi_k(Q_{ki}, \psi_{k0})} \left( 1 - \frac{R_{ki}}{\pi_k(Q_{ki}, \psi_{k0})} \right) \middle| Q_{ki} \right] E\{M_{ki}(dt, du_1) | Q_{ki}\} E\{M_{ki}(dt, du_2) | Q_{ki}\} \right\}.
\end{aligned}$$

Note that

$$\begin{aligned}
&Cov(\mathcal{B}_{ki}, \mathcal{B}_{ki}) \\
&= E \left\{ \int_0^1 \int_0^\tau \int_0^1 \int_0^\tau K_h(u_1 - v) K_h(u_2 - v) (Z_{ki}(t) - \bar{z}_k(t, \beta(u_1)))(Z_{ki}(t) - \bar{z}_k(t, \beta(u_2)))^T \right. \\
&\quad \left. E \left[ \left( 1 - \frac{R_{ki}}{\pi_k(Q_{ki}, \psi_{k0})} \right)^2 \middle| Q_{ki} \right] E\{M_{ki}(dt, du_1) | Q_{ki}\} E\{M_{ki}(dt, du_2) | Q_{ki}\} \right\}.
\end{aligned}$$

Since

$$E \left[ \frac{R_{ki}}{\pi_k(Q_{ki}, \psi_{k0})} \left( 1 - \frac{R_{ki}}{\pi_k(Q_{ki}, \psi_{k0})} \right) \middle| Q_{ki} \right] = -E \left[ \left( 1 - \frac{R_{ki}}{\pi_k(Q_{ki}, \psi_{k0})} \right)^2 \middle| Q_{ki} \right]$$

we have  $Cov(\mathcal{A}_{ki} + \mathcal{B}_{ki}, \mathcal{B}_{ki}) = 0$ .

By the conditional independence between  $R_{ki}$  and  $V_{ki}$  given  $Q_{ki}$ ,

$$\begin{aligned}
& Cov\{\mathcal{A}_{ki} + \mathcal{B}_{ki}, \mathcal{O}_{ki}\} \\
&= E \left[ \int_0^1 \int_0^\tau K_h(u-v)(Z_{ki}(t) - \bar{z}_k(t, \beta(u))) \left\{ \frac{R_{ki}}{\pi_k(Q_{ki}, \psi_{k0})} M_{ki}(dt, du) \right. \right. \\
&\quad \left. \left. + \left(1 - \frac{R_{ki}}{\pi_k(Q_{ki}, \psi_{k0})}\right) E\{M_{ki}(dt, du)|Q_{ki}\} \right\} \mathcal{O}_{ki} \right] \\
&= E \left[ \int_0^1 \int_0^\tau K_h(u-v)(Z_{ki}(t) - \bar{z}_k(t, \beta(u))) \left\{ E \left( \frac{R_{ki}}{\pi_k(Q_{ki}, \psi_{k0})} \mathcal{O}_{ki} \middle| Q_{ki} \right) E\{M_{ki}(dt, du)|Q_{ki}\} \right. \right. \\
&\quad \left. \left. + E \left( \left(1 - \frac{R_{ki}}{\pi_k(Q_{ki}, \psi_{k0})}\right) \mathcal{O}_{ki} \middle| Q_{ki} \right) E\{M_{ki}(dt, du)|Q_{ki}\} \right\} \right] \\
&= E \left[ \int_0^1 \int_0^\tau K_h(u-v)(Z_{ki}(t) - \bar{z}_k(t, \beta(u))) E\{\mathcal{O}_{ki}|Q_{ki}\} E\{M_{ki}(dt, du)|Q_{ki}\} \right] \\
&= 0.
\end{aligned}$$

The equality holds since  $E\{\mathcal{O}_{ki}|Q_{ki}\} = (n)^{-1/2} \mathcal{D}_k(I_k^\psi)^{-1} E\{S_{ki}^\psi|Q_{ki}\} = 0$ .  $\square$

## Additional References

Shorack, G. R. & Wellner, J. A. (1986). *Empirical Processes with Applications to Statistics*. Wiley, New York.

Sun, Y. & Wu, H. (2005). Semiparametric time-varying coefficients regression model for longitudinal data. *Scandinavian Journal of Statistics* **32**, 21–47.

van der Vaart, A. W. (1998). *Asymptotic Statistics*. Cambridge University Press, Cambridge.

## Web Appendix B

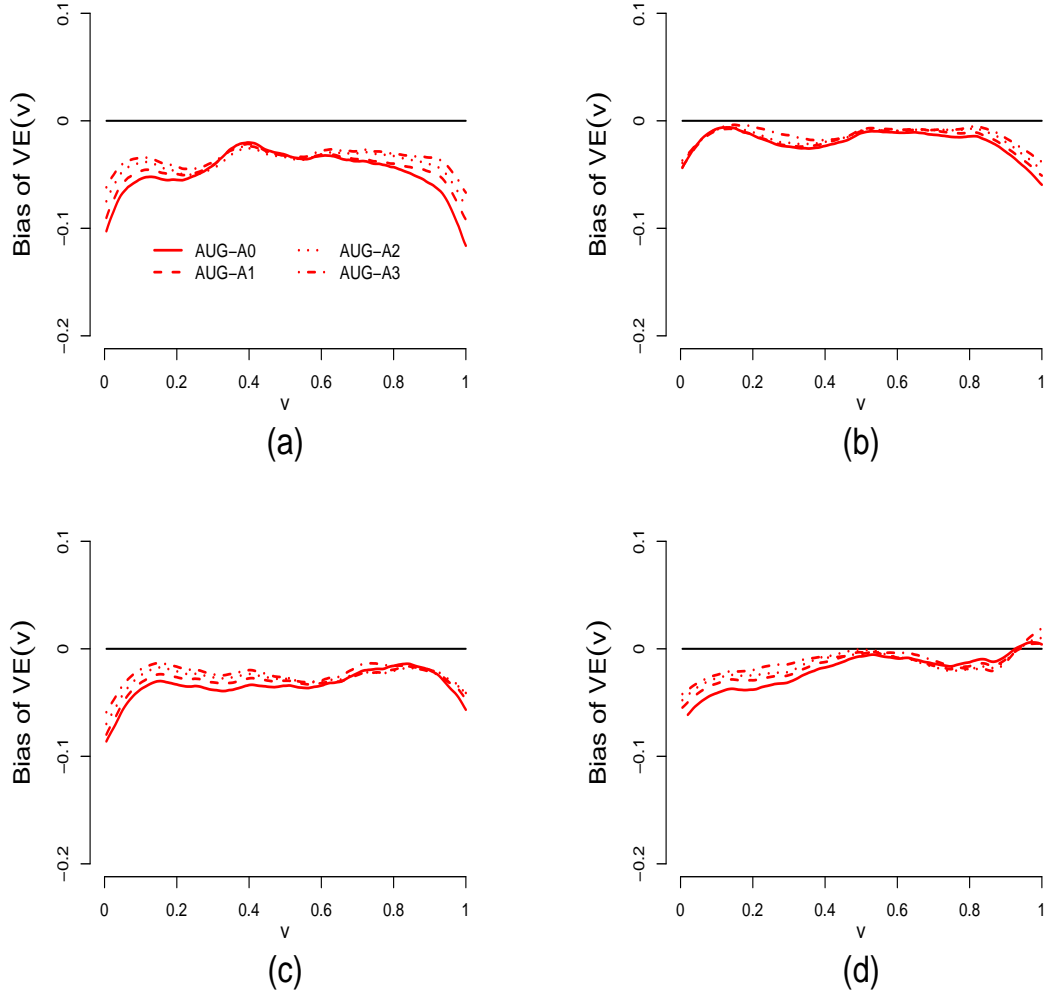

Figure 1: Bias of estimation of  $VE(v)$  using the AUG procedure based on 500 simulations for  $n = 500$ ,  $b_1 = 0.1$  and  $h = b_2 = 0.15$ : (a) for model (M1), (b) for model (M2), (c) for model (M3) and (d) for model (M4). AUG-A0 is the AUG estimator corresponding to  $\rho = 0$ , AUG-A1 for  $\rho \approx 0.78$ , AUG-A2 for  $\rho \approx 0.92$  and AUG-A3 for  $\rho \approx 0.98$ , where  $\rho$  is the correlation coefficient between  $A_{ki}$  and  $V_{ki}$ .

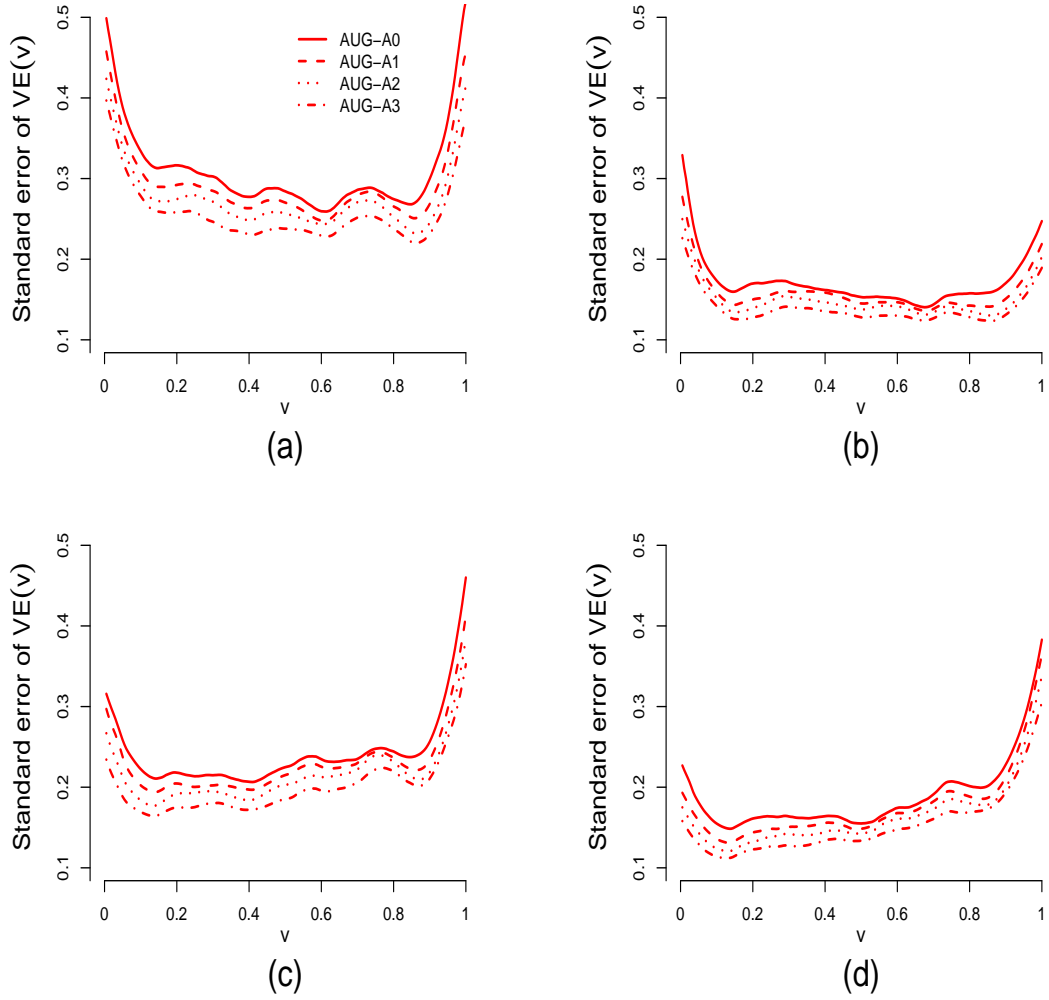

Figure 2: Average standard errors of the estimates for  $VE(v)$  using the AUG procedure based on 500 simulations for  $n = 500$ ,  $b_1 = 0.1$  and  $h = b_2 = 0.15$ : (a) for model (M1), (b) for model (M2), (c) for model (M3) and (d) for model (M4). AUG-A0 is the AUG estimator corresponding to  $\rho = 0$ , AUG-A1 for  $\rho \approx 0.78$ , AUG-A2 for  $\rho \approx 0.92$  and AUG-A3 for  $\rho \approx 0.98$ , where  $\rho$  is the correlation coefficient between  $A_{ki}$  and  $V_{ki}$ .

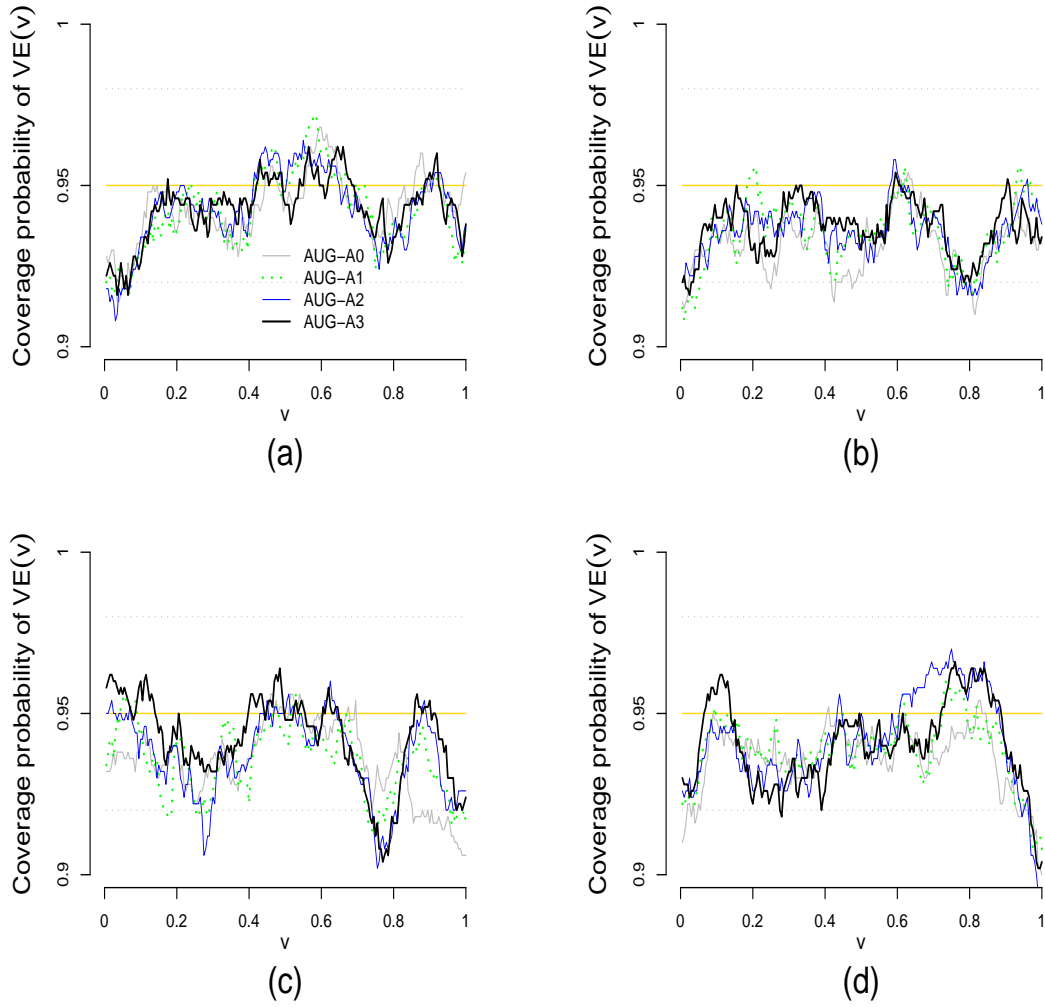

Figure 3: Estimated pointwise coverage probabilities of 95% confidence intervals for  $VE(v)$  constructed using the AUG estimator based on 500 simulations for  $n = 500$ ,  $b_1 = 0.1$  and  $h = b_2 = 0.15$ : (a) for model (M1), (b) for model (M2), (c) for model (M3) and (d) for model (M4). AUG-A0 is the AUG estimator corresponding to  $\rho = 0$ , AUG-A1 for  $\rho \approx 0.78$ , AUG-A2 for  $\rho \approx 0.92$  and AUG-A3 for  $\rho \approx 0.98$ , where  $\rho$  is the correlation coefficient between  $A_{ki}$  and  $V_{ki}$ .
